# Supplementary material for: Use of Dynamic Soluble Programmed Death-Ligand 1 Trajectories to Identify Early Organ Dysfunction and Predict Mortality in Critical Coronavirus Disease 2019
Source: Research Square preprint supplement (doi:10.21203/rs.3.rs-7521856/v1), 2025-10-03
Supplement: Supplementary file 1 [file 307f298fc161e4135909dfd3.xlsx]

## Sheet: Sheet1
Model	Parameter	Search grid
SVM	C	0.1, 1, 10, 100
SVM	kernel	rbf, linear, poly, sigmoid
SVM	gamma	scale, auto, 0.1, 1
SVM	degree	2, 3, 4
SVM	coef0	0.0, 0.1, 0.5
Neural Network	hidden_layer_sizes	(50,), (100,), (50, 50)
Neural Network	alpha	0.0001, 0.001, 0.01
Decision Tree	max_depth	None, 5, 10
Decision Tree	min_samples_split	2, 5, 10
Random Forest	n_estimators	50, 100, 200
Random Forest	max_depth	None, 5, 10
